# Supplementary material for: A Transcriptomics-Based Bioinformatics Approach for Identification and In Vitro Screening of FDA-Approved Drugs for Repurposing against Dengue Virus-2
Source: MDPI journal article supplement (doi:10.3390/v14102150), 2022-09-29
Supplement: s1 [file s1]

**Table S1 Signature genes identified using GEO datasets**

| <b>Sr.<br/>No</b> | <b>Gene List</b>                                |
|-------------------|-------------------------------------------------|
| 1                 | AAG5                                            |
| 2                 | ABCA5                                           |
| 3                 | ABCB9                                           |
| 4                 | ABCC13                                          |
| 5                 | ABLIM1                                          |
| 6                 | ACACB                                           |
| 7                 | ACAT1                                           |
| 8                 | ACBD5                                           |
| 9                 | ACOT7                                           |
| 10                | ACOX1                                           |
| 11                | ACTG1                                           |
| 12                | ACTG1P4///AMY2B///AMY2A///AMY1C///AMY1B///AMY1A |
| 13                | ACTN1                                           |
| 14                | ACTN4                                           |
| 15                | ACVR1B                                          |
| 16                | ACVR2A                                          |
| 17                | ADA                                             |
| 18                | ADAM19                                          |
| 19                | ADAM9                                           |
| 20                | ADCY3                                           |
| 21                | ADD2                                            |
| 22                | ADGRE2                                          |
| 23                | ADGRE3                                          |
| 24                | ADGRF3                                          |
| 25                | ADPRM                                           |
| 26                | ADRB2                                           |
| 27                | ADTRP                                           |
| 28                | AGFG1                                           |
| 29                | AGFG2                                           |
| 30                | AHCYL2                                          |
| 31                | AHNAK                                           |
| 32                | AHSA2                                           |
| 33                | AIFM2                                           |
| 34                | AK2                                             |
| 35                | AK5                                             |
| 36                | AKT3                                            |
| 37                | ALAS2                                           |
| 38                | ALCAM                                           |
| 39                | ALDH1L2                                         |
| 40                | ALG14                                           |
| 41                | ALPL                                            |

|    |                          |
|----|--------------------------|
| 42 | ALYREF                   |
| 43 | AMIGO1                   |
| 44 | ANAPC16                  |
| 45 | ANKH                     |
| 46 | ANKHD1                   |
| 47 | ANKRD31                  |
| 48 | ANKRD36BP2               |
| 49 | ANLN                     |
| 50 | ANP32E                   |
| 51 | ANXA1                    |
| 52 | ANXA11                   |
| 53 | ANXA2                    |
| 54 | ANXA2P2                  |
| 55 | ANXA4                    |
| 56 | ANXA5                    |
| 57 | APBA2                    |
| 58 | APITD1-CORT///APITD1     |
| 59 | APOBEC3B                 |
| 60 | APOBEC3G                 |
| 61 | APOL2                    |
| 62 | APP                      |
| 63 | ARAP2                    |
| 64 | ARAP3                    |
| 65 | ARHGAP11A                |
| 66 | ARHGAP18                 |
| 67 | ARHGAP42                 |
| 68 | ARHGEF2                  |
| 69 | ARHGEF40                 |
| 70 | ARID5B                   |
| 71 | ARL4C                    |
| 72 | ARL6IP1                  |
| 73 | ARMCX5-GPRASP2///GPRASP2 |
| 74 | ARNTL2                   |
| 75 | ARPC5L                   |
| 76 | ARRB1                    |
| 77 | ARRDC3                   |
| 78 | ASC1P100                 |
| 79 | ASF1B                    |
| 80 | ASNS                     |
| 81 | ASPH                     |
| 82 | ASPM                     |
| 83 | ATAD2                    |
| 84 | ATF2                     |
| 85 | ATL2                     |

|     |         |
|-----|---------|
| 86  | ATM     |
| 87  | ATP1B1  |
| 88  | ATP1B3  |
| 89  | ATP2A2  |
| 90  | ATP2B4  |
| 91  | ATP6AP1 |
| 92  | ATP6AP2 |
| 93  | ATXN1   |
| 94  | AURKA   |
| 95  | AURKB   |
| 96  | AUTS2   |
| 97  | AXL     |
| 98  | B4GALT5 |
| 99  | B9D1    |
| 100 | BACH2   |
| 101 | BAG1    |
| 102 | BAG2    |
| 103 | BAIAP2  |
| 104 | BARD1   |
| 105 | BAZ2A   |
| 106 | BBS2    |
| 107 | BCAM    |
| 108 | BCAS4   |
| 109 | BCAT1   |
| 110 | BCL2    |
| 111 | BCL2L11 |
| 112 | BCL2L13 |
| 113 | BEX2    |
| 114 | BEX3    |
| 115 | BEX5    |
| 116 | BFSP1   |
| 117 | BHLHA15 |
| 118 | BHLHE40 |
| 119 | BIRC5   |
| 120 | BMI1    |
| 121 | BMS1P20 |
| 122 | BMS1P6  |
| 123 | BRCA1   |
| 124 | BRCA2   |
| 125 | BRD2    |
| 126 | BRD4    |
| 127 | BRD8    |
| 128 | BRI3BP  |
| 129 | BRIP1   |
| 130 | BTG3    |

|     |            |
|-----|------------|
| 131 | BUB1       |
| 132 | BUB1B      |
| 133 | C10orf35   |
| 134 | C11orf21   |
| 135 | C12orf57   |
| 136 | C12orf75   |
| 137 | C14orf28   |
| 138 | C17orf96   |
| 139 | C17orf97   |
| 140 | C19orf33   |
| 141 | C1GALT1C1  |
| 142 | C1orf106   |
| 143 | C1orf123   |
| 144 | C1orf162   |
| 145 | C1orf56    |
| 146 | C1QB       |
| 147 | C21orf2    |
| 148 | C2orf40    |
| 149 | C3orf14    |
| 150 | C3orf58    |
| 151 | C4orf32    |
| 152 | C4orf46    |
| 153 | C5orf63    |
| 154 | C6orf120   |
| 155 | C6orf52    |
| 156 | C9orf72    |
| 157 | CA6        |
| 158 | CACNA2D3   |
| 159 | CADM1      |
| 160 | CALR       |
| 161 | CALU       |
| 162 | CAND2      |
| 163 | CARMIL1    |
| 164 | CASKIN2    |
| 165 | CASS4      |
| 166 | CAV1       |
| 167 | CBX1       |
| 168 | CBY1       |
| 169 | CCDC134    |
| 170 | CCDC150    |
| 171 | CCDC167    |
| 172 | CCDC18-AS1 |
| 173 | CCDC50     |
| 174 | CCDC58     |
| 175 | CCDC65     |

|     |         |
|-----|---------|
| 176 | CCDC7   |
| 177 | CCL28   |
| 178 | CCL4    |
| 179 | CCL5    |
| 180 | CCNA2   |
| 181 | CCNB1   |
| 182 | CCNB2   |
| 183 | CCND2   |
| 184 | CCND3   |
| 185 | CCNE1   |
| 186 | CCNE2   |
| 187 | CCNF    |
| 188 | CCNJL   |
| 189 | CCR1    |
| 190 | CCR10   |
| 191 | CCR2    |
| 192 | CCR3    |
| 193 | CCR5    |
| 194 | CCR7    |
| 195 | CD109   |
| 196 | CD38    |
| 197 | CD53    |
| 198 | CD58    |
| 199 | CD59    |
| 200 | CD6     |
| 201 | CD74    |
| 202 | CD86    |
| 203 | CD99    |
| 204 | CDC123  |
| 205 | CDC20   |
| 206 | CDC25A  |
| 207 | CDC37L1 |
| 208 | CDC45   |
| 209 | CDC6    |
| 210 | CDC7    |
| 211 | CDCA2   |
| 212 | CDCA3   |
| 213 | CDCA5   |
| 214 | CDCA7   |
| 215 | CDCA8   |
| 216 | CDK1    |
| 217 | CDK2    |
| 218 | CDK2AP1 |
| 219 | CDK4    |
| 220 | CDK5R1  |

|     |           |
|-----|-----------|
| 221 | CDKN2A    |
| 222 | CDKN2C    |
| 223 | CDKN3     |
| 224 | CDS2      |
| 225 | CDT1      |
| 226 | CEBPD     |
| 227 | CENPA     |
| 228 | CENPE     |
| 229 | CENPF     |
| 230 | CENPI     |
| 231 | CENPM     |
| 232 | CENPN     |
| 233 | CENPQ     |
| 234 | CENPU     |
| 235 | CENPW     |
| 236 | CEP104    |
| 237 | CEP128    |
| 238 | CEP152    |
| 239 | CEP55     |
| 240 | CEP68     |
| 241 | CEP76     |
| 242 | CES1      |
| 243 | CFAP44    |
| 244 | CFL2      |
| 245 | CHAC2     |
| 246 | CHAF1A    |
| 247 | CHAF1B    |
| 248 | CHCHD2    |
| 249 | CHEK1     |
| 250 | CHI3L1    |
| 251 | CHID1     |
| 252 | CHP1      |
| 253 | CHRM3-AS2 |
| 254 | CIITA     |
| 255 | CISD2     |
| 256 | CIZ1      |
| 257 | CKAP2L    |
| 258 | CKS1B     |
| 259 | CKS2      |
| 260 | CLDN1     |
| 261 | CLEC11A   |
| 262 | CLECL1    |
| 263 | CLIC1     |
| 264 | CLIC4     |
| 265 | CLN5      |

|     |                 |
|-----|-----------------|
| 266 | CLNS1A          |
| 267 | CLSPN           |
| 268 | CLU             |
| 269 | CLUHP3///ZNF720 |
| 270 | CMPK2           |
| 271 | CMTM2           |
| 272 | CMTM7           |
| 273 | CNN3            |
| 274 | CNTN1           |
| 275 | CNTNAP3         |
| 276 | CNTNAP3B        |
| 277 | COA1            |
| 278 | COBLL1          |
| 279 | COL10A1         |
| 280 | COLGALT1        |
| 281 | CORO1C          |
| 282 | COTL1           |
| 283 | COX8A           |
| 284 | CPPED1          |
| 285 | CPSF2           |
| 286 | CR2             |
| 287 | CREB5           |
| 288 | CREBBP          |
| 289 | CREM            |
| 290 | CRIP1           |
| 291 | CRTAM           |
| 292 | CRTAP           |
| 293 | CSGALNACT1      |
| 294 | CSNK1A1         |
| 295 | CSRP1           |
| 296 | CST7            |
| 297 | CTLA4           |
| 298 | CTNNA1          |
| 299 | CTNNAL1         |
| 300 | CTSB            |
| 301 | CTSC            |
| 302 | CTSD            |
| 303 | CTSL1           |
| 304 | CX3CR1          |
| 305 | CXCL1           |
| 306 | CXCR3           |
| 307 | CXCR6           |
| 308 | CXorf26         |
| 309 | CYAT1           |

|     |                             |
|-----|-----------------------------|
| 310 | CYAT1///IGLV1-44///IGLC1    |
| 311 | CYAT1///IGLV1-44///IGLV7-43 |
| 312 | CYP20A1                     |
| 313 | CYP24A1                     |
| 314 | CYP2R1                      |
| 315 | CYP3A5                      |
| 316 | CYP51A1                     |
| 317 | DCAF12                      |
| 318 | DCHS1                       |
| 319 | DCPS                        |
| 320 | DDIAS                       |
| 321 | DDR2                        |
| 322 | DDX3Y                       |
| 323 | DDX58                       |
| 324 | DENND1B                     |
| 325 | DENND2D                     |
| 326 | DENND5A                     |
| 327 | DENND5B                     |
| 328 | DEPDC1                      |
| 329 | DEPDC1B                     |
| 330 | DERL3                       |
| 331 | DESI2                       |
| 332 | DGKA                        |
| 333 | DHFR                        |
| 334 | DHRS1                       |
| 335 | DHRS3                       |
| 336 | DHX8                        |
| 337 | DIAPH3                      |
| 338 | DKC1                        |
| 339 | DKFZp781G1976               |
| 340 | DKK3                        |
| 341 | DLEU2                       |
| 342 | DLG3                        |
| 343 | DLG5                        |
| 344 | DLGAP5                      |
| 345 | DMC1                        |
| 346 | DMTN                        |
| 347 | DNAJB11                     |
| 348 | DNAJB12                     |
| 349 | DNAJC3                      |
| 350 | DNAJC30                     |
| 351 | DOCK5                       |
| 352 | DOCK9                       |



|     |           |
|-----|-----------|
| 353 | DONSON    |
| 354 | DPP3      |
| 355 | DSC1      |
| 356 | DSC2      |
| 357 | DSCC1     |
| 358 | DSEL      |
| 359 | DSP       |
| 360 | DTHD1     |
| 361 | DTL       |
| 362 | DTWD1     |
| 363 | DUSP10    |
| 364 | DUSP4     |
| 365 | DUSP5     |
| 366 | DUT       |
| 367 | DVL2      |
| 368 | E2F1      |
| 369 | E2F2      |
| 370 | E2F7      |
| 371 | E2F8      |
| 372 | EAF2      |
| 373 | ECI2      |
| 374 | ECT2      |
| 375 | EEF1A1    |
| 376 | EEF1A2    |
| 377 | EFCAB11   |
| 378 | EFCAB13   |
| 379 | EFHD2     |
| 380 | EFR3A     |
| 381 | EGR1      |
| 382 | EGR3      |
| 383 | EHD4      |
| 384 | EIF1      |
| 385 | EIF1AY    |
| 386 | EIF3B     |
| 387 | EIF3D     |
| 388 | EIF3M     |
| 389 | EIF4ENIF1 |
| 390 | ELF3      |
| 391 | ELL2      |
| 392 | EME1      |
| 393 | ENC1      |
| 394 | ENDOG     |
| 395 | EPB42     |
| 396 | EPDR1     |
| 397 | EPHA1-AS1 |

|     |                   |
|-----|-------------------|
| 398 | EPHB4             |
| 399 | EPHX2             |
| 400 | EPPK1             |
| 401 | EPSTI1            |
| 402 | EPT1              |
| 403 | ERAP1             |
| 404 | ERC1              |
| 405 | ERCC1             |
| 406 | ERI1              |
| 407 | ERLEC1            |
| 408 | ERMP1             |
| 409 | ESCO2             |
| 410 | ESPL1             |
| 411 | ESYT2             |
| 412 | EXO1              |
| 413 | EZH2              |
| 414 | F11R              |
| 415 | F2R               |
| 416 | F2RL1             |
| 417 | F8                |
| 418 | FABP5             |
| 419 | FADS1             |
| 420 | FADS2             |
| 421 | FAHD1             |
| 422 | FAM111B           |
| 423 | FAM115A           |
| 424 | FAM117B           |
| 425 | FAM126A           |
| 426 | FAM129A           |
| 427 | FAM134B           |
| 428 | FAM166A           |
| 429 | FAM169A           |
| 430 | FAM175A           |
| 431 | FAM177A1          |
| 432 | FAM184B           |
| 433 | FAM185A           |
| 434 | FAM207A           |
| 435 | FAM208B           |
| 436 | FAM210B           |
| 437 | FAM212B           |
| 438 | FAM223A///FAM223B |
| 439 | FAM226B///FAM226A |
| 440 | FAM3A             |
| 441 | FAM46C            |
| 442 | FAM49A            |

|     |                                   |
|-----|-----------------------------------|
| 443 | FAM72A///FAM72B///FAM72C          |
| 444 | FAM72A///FAM72D///FAM72B///FAM72C |
| 445 | FAM83D                            |
| 446 | FAM98A                            |
| 447 | FANCG                             |
| 448 | FANCI                             |
| 449 | FANCL                             |
| 450 | FAS                               |
| 451 | FASLG                             |
| 452 | FBLN5                             |
| 453 | FBRSL1                            |
| 454 | FBXL4                             |
| 455 | FBXO31                            |
| 456 | FBXO32                            |
| 457 | FBXO5                             |
| 458 | FBXO6                             |
| 459 | FBXO7                             |
| 460 | FCER1A                            |
| 461 | FCGBP                             |
| 462 | FCGR3B                            |
| 463 | FCGR3B///FCGR3A                   |
| 464 | FCGRT                             |
| 465 | FCHO2                             |
| 466 | FCRL5                             |
| 467 | FDFT1                             |
| 468 | FEN1                              |
| 469 | FGF2                              |
| 470 | FGF9                              |
| 471 | FGFBP2                            |
| 472 | FH                                |
| 473 | FHIT                              |
| 474 | FKBP10                            |
| 475 | FKBP11                            |
| 476 | FLNA                              |
| 477 | FLNB                              |
| 478 | FNDC3A                            |
| 479 | FNIP2                             |
| 480 | FNTB                              |
| 481 | FOSL2                             |
| 482 | FOXK2                             |
| 483 | FOXO1                             |
| 484 | FOXO3                             |
| 485 | FOXO3B///FOXO3                    |

|     |                        |
|-----|------------------------|
| 486 | FOXP1                  |
| 487 | FTH1                   |
| 488 | FTSJ1                  |
| 489 | FTSJD2                 |
| 490 | FTX                    |
| 491 | FXR1                   |
| 492 | GABBR1                 |
| 493 | GAL3ST4                |
| 494 | GALM                   |
| 495 | GALNT1                 |
| 496 | GALNT2                 |
| 497 | GAPDH                  |
| 498 | GAS6                   |
| 499 | GATAD2B                |
| 500 | GBP1                   |
| 501 | GCC2                   |
| 502 | GCNT1                  |
| 503 | GCNT4                  |
| 504 | GCSAM                  |
| 505 | GEN1                   |
| 506 | GFI1                   |
| 507 | GFOD1                  |
| 508 | GFPT1                  |
| 509 | GGH                    |
| 510 | GGTA1P                 |
| 511 | GIMAP1-GIMAP5///GIMAP5 |
| 512 | GINS1                  |
| 513 | GINS2                  |
| 514 | GINS3                  |
| 515 | GINS4                  |
| 516 | GK5                    |
| 517 | GKAP1                  |
| 518 | GLB1                   |
| 519 | GLDC                   |
| 520 | GLUL                   |
| 521 | GMNN                   |
| 522 | GMPPB                  |
| 523 | GNAQ                   |
| 524 | GNAS                   |
| 525 | GNL3L                  |
| 526 | GNLY                   |
| 527 | GNPAT                  |
| 528 | GOLIM4                 |
| 529 | GOLM1                  |

|     |                 |
|-----|-----------------|
| 530 | GON7            |
| 531 | GP5             |
| 532 | GPCPD1          |
| 533 | GPKOW           |
| 534 | GPM6B           |
| 535 | GPR146          |
| 536 | GPRASP1         |
| 537 | GPRC5D          |
| 538 | GPRIN3          |
| 539 | GRAMD1A         |
| 540 | GRAMD1C         |
| 541 | GRIP1           |
| 542 | GRWD1           |
| 543 | GSG2            |
| 544 | GSTM3           |
| 545 | GTF2I           |
| 546 | GTSE1           |
| 547 | GUSBP11         |
| 548 | GZMA            |
| 549 | GZMB            |
| 550 | GZMH            |
| 551 | H2AFJ           |
| 552 | H2AFX           |
| 553 | H2BFS           |
| 554 | HAUS1           |
| 555 | HAVCR2          |
| 556 | HBB             |
| 557 | HBG2///HBG1     |
| 558 | HBQ1            |
| 559 | HCAR3           |
| 560 | HCG8///ZNRD1ASP |
| 561 | HDAC8           |
| 562 | HDLBP           |
| 563 | HELLS           |
| 564 | HERC5           |
| 565 | HEY1            |
| 566 | HIPK2           |
| 567 | HIST1H1A        |
| 568 | HIST1H1B        |
| 569 | HIST1H1C        |
| 570 | HIST1H1D        |
| 571 | HIST1H2AB       |
| 572 | HIST1H2AE       |
| 573 | HIST1H2AJ       |
| 574 | HIST1H2AL       |

|     |                       |
|-----|-----------------------|
| 575 | HIST1H2AM             |
| 576 | HIST1H2BB             |
| 577 | HIST1H2BE             |
| 578 | HIST1H2BH             |
| 579 | HIST1H2BJ///HIST1H2BG |
| 580 | HIST1H2BM             |
| 581 | HIST1H2BN             |
| 582 | HIST1H2BO             |
| 583 | HIST1H3B              |
| 584 | HIST1H3C              |
| 585 | HIST1H3D///HIST1H2AD  |
| 586 | HIST1H3F              |
| 587 | HIST1H3G              |
| 588 | HIST1H3I              |
| 589 | HIST1H4J              |
| 590 | HIST1H4L              |
| 591 | HIST3H2A              |
| 592 | HIVEP3                |
| 593 | HJURP                 |
| 594 | HLA-DMA               |
| 595 | HLA-DOA               |
| 596 | HLA-DPA1              |
| 597 | HLA-DQA1              |
| 598 | HLA-DRA               |
| 599 | HLA-DRB1              |
| 600 | HLA-DRB4              |
| 601 | HLA-DRB6              |
| 602 | HMGA1                 |
| 603 | HMGB2                 |
| 604 | HMGB3                 |
| 605 | HMGB3P1               |
| 606 | HMMR                  |
| 607 | HMMR-AS1              |
| 608 | HN1                   |
| 609 | HNRNPLL               |
| 610 | HOOK1                 |
| 611 | HOPX                  |
| 612 | HRASLS                |
| 613 | HRASLS2               |
| 614 | HSD17B4               |
| 615 | HSP90B1               |
| 616 | HSPA13                |
| 617 | HSPA5                 |
| 618 | HSPB11                |
| 619 | HSPC102               |

|     |                                                                      |
|-----|----------------------------------------------------------------------|
| 620 | HSPD1                                                                |
| 621 | HUWE1                                                                |
| 622 | HYOU1                                                                |
| 623 | ICA1                                                                 |
| 624 | IDE                                                                  |
| 625 | IDH2                                                                 |
| 626 | IFI27                                                                |
| 627 | IFI27L1                                                              |
| 628 | IFI44L                                                               |
| 629 | IFIT1                                                                |
| 630 | IFIT2                                                                |
| 631 | IFIT3                                                                |
| 632 | IFNG                                                                 |
| 633 | IFNLR1                                                               |
| 634 | IGF1                                                                 |
| 635 | IGF1R                                                                |
| 636 | IGF2BP2                                                              |
| 637 | IGHD                                                                 |
| 638 | IGHG1///IGHD///IGHA2///IGH                                           |
| 639 | IGHM                                                                 |
| 640 | IGHM///IGHG4///IGHG3///IGHG1///IGHD///IGHA2///IGHA1///IGH            |
| 641 | IGHV3-47                                                             |
| 642 | IGHV4-31///IGHM///IGHG3///IGHG1///IGHA2///IGHA1///IGH                |
| 643 | IGHV4-31///IGHM///IGHG4///IGHG3///IGHG1///IGHD///IGHA2///IGHA1///IGH |
| 644 | IGIP                                                                 |
| 645 | IGKV1D-13                                                            |
| 646 | IGKV3-20                                                             |
| 647 | IGKV4-1                                                              |
| 648 | IGL                                                                  |
| 649 | IGLJ3                                                                |
| 650 | IGLJ3///CKAP2///IGLV@///IGLC1                                        |
| 651 | IGLJ3///IGLV1-44///CKAP2///IGLV@///IGLC1                             |
| 652 | IGLL3P                                                               |

|     |                                     |
|-----|-------------------------------------|
| 653 | IGLL3P///GUSBP11///IGLL1            |
| 654 | IGLL5///IGLV3-16///IGLV3-25///IGLC1 |
| 655 | IGLV1-44                            |
| 656 | IGLV2-23                            |
| 657 | IGLV3-19                            |
| 658 | IGLV4-60                            |
| 659 | IGLV6-57                            |
| 660 | IL12RB2                             |
| 661 | IL13RA1                             |
| 662 | IL18RAP                             |
| 663 | IL1B                                |
| 664 | IL1RAP                              |
| 665 | IL23A                               |
| 666 | IL24                                |
| 667 | IL2RB                               |
| 668 | IL6R                                |
| 669 | IL6ST                               |
| 670 | IL7R                                |
| 671 | INPP5K                              |
| 672 | IREB2                               |
| 673 | IRF2BP2                             |
| 674 | IRF4                                |
| 675 | IRS2                                |
| 676 | ISG15                               |
| 677 | ITFG3                               |
| 678 | ITGA6                               |
| 679 | ITGAM                               |
| 680 | ITGB1                               |
| 681 | ITGB4                               |
| 682 | ITGB5                               |
| 683 | ITLN1                               |
| 684 | ITM2C                               |
| 685 | ITPKB                               |
| 686 | ITPR3                               |
| 687 | ITPRIP                              |
| 688 | ITPRIPL2                            |
| 689 | JAKMIP1                             |
| 690 | JAZF1                               |
| 691 | JUN                                 |
| 692 | KANSL1                              |
| 693 | KANSL1L                             |
| 694 | KATNAL1                             |
| 695 | KATNBL1                             |



|     |          |
|-----|----------|
| 696 | KAZN     |
| 697 | KBTBD8   |
| 698 | KCNJ2    |
| 699 | KCNN3    |
| 700 | KCTD1    |
| 701 | KCTD14   |
| 702 | KDM1A    |
| 703 | KDM4B    |
| 704 | KDM5C    |
| 705 | KDM5D    |
| 706 | KEAP1    |
| 707 | KIAA0101 |
| 708 | KIAA0141 |
| 709 | KIAA0355 |
| 710 | KIAA1147 |
| 711 | KIAA1324 |
| 712 | KIAA1522 |
| 713 | KIAA1671 |
| 714 | KIF11    |
| 715 | KIF14    |
| 716 | KIF15    |
| 717 | KIF18A   |
| 718 | KIF18B   |
| 719 | KIF20A   |
| 720 | KIF20B   |
| 721 | KIF22    |
| 722 | KIF23    |
| 723 | KIF2C    |
| 724 | KIF4A    |
| 725 | KIFC1    |
| 726 | KLB      |
| 727 | KLF16    |
| 728 | KLF2     |
| 729 | KLF7     |
| 730 | KLF9     |
| 731 | KLHDC1   |
| 732 | KLHL14   |
| 733 | KLHL3    |
| 734 | KLHL34   |
| 735 | KLHL9    |
| 736 | KLRC4    |
| 737 | KLRD1    |
| 738 | KNL1     |
| 739 | KPNA2    |
| 740 | KPNA5    |

|     |                             |
|-----|-----------------------------|
| 741 | KRT1                        |
| 742 | KRT23                       |
| 743 | KRT6B                       |
| 744 | KTN1                        |
| 745 | LAG3                        |
| 746 | LAMC1                       |
| 747 | LAP3                        |
| 748 | LAPTM4B                     |
| 749 | LARP4                       |
| 750 | LARP7                       |
| 751 | LCP2                        |
| 752 | LDLR                        |
| 753 | LDLRAP1                     |
| 754 | LEF1                        |
| 755 | LEF1-AS1                    |
| 756 | LEPREL2                     |
| 757 | LEPROT                      |
| 758 | LGALS1                      |
| 759 | LGALS3                      |
| 760 | LGALS3BP                    |
| 761 | LGALSL                      |
| 762 | LGMN                        |
| 763 | LHX4                        |
| 764 | LIM2                        |
| 765 | LIMK2                       |
| 766 | LIMS4///LIMS3///LIMS1       |
| 767 | LINC00282                   |
| 768 | LINC00467                   |
| 769 | LINC00663                   |
| 770 | LINC00954                   |
| 771 | LINC01128                   |
| 772 | LINC01550                   |
| 773 | LIPA                        |
| 774 | LMF1                        |
| 775 | LMLN                        |
| 776 | LMNB1                       |
| 777 | LMO7                        |
| 778 | LOC100130872///SPON2        |
| 779 | LOC100131541                |
| 780 | LOC100132910///GALNT2       |
| 781 | LOC100133862///IGHM///IGHG1 |
| 782 | LOC100287723                |
| 783 | LOC100287896                |

|     |                                                                          |
|-----|--------------------------------------------------------------------------|
| 784 | LOC100289230                                                             |
| 785 | LOC100289612                                                             |
| 786 | LOC100291464///IGK///IGKC                                                |
| 787 | LOC100291464///LOC100130100                                              |
| 788 | LOC100291682///IGK///IGKV3-20///IGKC                                     |
| 789 | LOC100292999///LOC100290059///IGHD                                       |
| 790 | LOC100293277///IGLC1                                                     |
| 791 | LOC100293440                                                             |
| 792 | LOC100293440///IGLV2-23                                                  |
| 793 | LOC100505501                                                             |
| 794 | LOC100505715                                                             |
| 795 | LOC100506548///RPL37                                                     |
| 796 | LOC100506990                                                             |
| 797 | LOC100996286                                                             |
| 798 | LOC100996385                                                             |
| 799 | LOC100996809///HLA-DRB4///HLA-DRB1                                       |
| 800 | LOC101060391                                                             |
| 801 | LOC101060835///LOC100996809///HLA-DRB4///HLA-DRB3///HLA-DRB1///HLA-DQB1  |
| 802 | LOC101060835///LOC100996809///HLA-DRB5///HLA-DRB4///HLA-DRB1///HLA-DQB1  |
| 803 | LOC101927402                                                             |
| 804 | LOC101928140                                                             |
| 805 | LOC101928173                                                             |
| 806 | LOC101928893                                                             |
| 807 | LOC101929373///SLC9B1                                                    |
| 808 | LOC101930363///LOC101928349///LOC100507387///FAM153C///FAM153A///FAM153B |
| 809 | LOC101930370                                                             |
| 810 | LOC101930489///MIR4435-2HG///LINC00152                                   |

|     |                                                     |
|-----|-----------------------------------------------------|
| 811 | LOC102606465                                        |
| 812 | LOC102725213///LOC100507387///FAM153A///FAM153B     |
| 813 | LOC105372881                                        |
| 814 | LOC107985971                                        |
| 815 | LOC202025                                           |
| 816 | LOC286052                                           |
| 817 | LOC652493                                           |
| 818 | LOC652493///IGK///IGKC                              |
| 819 | LOC652494///IGHM                                    |
| 820 | LOC652494///IGHV4-31///IGHM///IGHG3///IGHG1///IGHA1 |
| 821 | LOC727820                                           |
| 822 | LOC730101                                           |
| 823 | LONP2                                               |
| 824 | LPCAT3                                              |
| 825 | LRIG2                                               |
| 826 | LRP8                                                |
| 827 | LRR1                                                |
| 828 | LRRC59                                              |
| 829 | LRRN3                                               |
| 830 | LSS                                                 |
| 831 | LUC7L                                               |
| 832 | LY9                                                 |
| 833 | LYZ                                                 |
| 834 | MAD2L1                                              |
| 835 | MAD2L1BP                                            |
| 836 | MAF                                                 |
| 837 | MAGED2                                              |
| 838 | MAGEE1                                              |
| 839 | MAGI3                                               |
| 840 | MAGT1                                               |
| 841 | MAK                                                 |
| 842 | MAL                                                 |
| 843 | MAML2                                               |
| 844 | MAN1A1                                              |
| 845 | MAN1C1                                              |
| 846 | MANEA                                               |
| 847 | MANF                                                |
| 848 | MAP2K6                                              |
| 849 | MAP3K5                                              |
| 850 | MAP3K7CL                                            |

|     |                         |
|-----|-------------------------|
| 851 | MAP4K4                  |
| 852 | MAP7                    |
| 853 | MAST4                   |
| 854 | MASTL                   |
| 855 | MATN1-AS1               |
| 856 | MAVS                    |
| 857 | MB21D1                  |
| 858 | MBNL3                   |
| 859 | MCC                     |
| 860 | MCM10                   |
| 861 | MCM2                    |
| 862 | MCM4                    |
| 863 | MCM5                    |
| 864 | MCM6                    |
| 865 | MCM7                    |
| 866 | MCOLN2                  |
| 867 | MCUR1                   |
| 868 | MED12                   |
| 869 | MED14                   |
| 870 | MED18                   |
| 871 | MED31                   |
| 872 | MEGF6                   |
| 873 | MELK                    |
| 874 | MEST                    |
| 875 | MET                     |
| 876 | MFN1                    |
| 877 | MFSD8                   |
| 878 | MGA                     |
| 879 | MGAT4A                  |
| 880 | MGC16275                |
| 881 | MGME1                   |
| 882 | MGRN1                   |
| 883 | MICAL2                  |
| 884 | MICB                    |
| 885 | MID1                    |
| 886 | MID1IP1                 |
| 887 | MID2                    |
| 888 | MINPP1                  |
| 889 | MIR1282///HYPK///SERF2  |
| 890 | MIR15A///DLEU2          |
| 891 | MIR15A///DLEU2L///DLEU2 |
| 892 | MIR21///VMP1            |
| 893 | MIR3658///UCK2          |

|     |                                                            |
|-----|------------------------------------------------------------|
| 894 | MIR4435-2HG                                                |
| 895 | MIR6845///NRBP2                                            |
| 896 | MIR6883///PER1                                             |
| 897 | MKI67                                                      |
| 898 | MLH3                                                       |
| 899 | MLLT3                                                      |
| 900 | MLXIP                                                      |
| 901 | MMADHC                                                     |
| 902 | MMD                                                        |
| 903 | MMP28                                                      |
| 904 | MND1                                                       |
| 905 | MOGS                                                       |
| 906 | MORF4L1                                                    |
| 907 | MORF4L2                                                    |
| 908 | MPC2                                                       |
| 909 | MPP7                                                       |
| 910 | MRPL38                                                     |
| 911 | MRPS18C                                                    |
| 912 | MT1E                                                       |
| 913 | MT2A                                                       |
| 914 | MTERF2                                                     |
| 915 | MTFR2                                                      |
| 916 | MTHFD1                                                     |
| 917 | MTHFD1L                                                    |
| 918 | MTHFD2                                                     |
| 919 | MTUS1                                                      |
| 920 | MX1                                                        |
| 921 | MYBL2                                                      |
| 922 | MYDGF                                                      |
| 923 | MYL4                                                       |
| 924 | MYL6B                                                      |
| 925 | MYO1D                                                      |
| 926 | MYO1F                                                      |
| 927 | MZB1                                                       |
| 928 | N/A                                                        |
| 929 | N4BP2L2                                                    |
| 930 | NAAA                                                       |
| 931 | NADK                                                       |
| 932 | NBPF1                                                      |
| 933 | NBPF20///NBPF10///NBPF8///NBPF9///NBPF15///NBPF12///NBPF14 |

|     |                                                                                            |
|-----|--------------------------------------------------------------------------------------------|
| 934 | NBPF25P///NBPF26///NBPF19///NBPF20///NBPF10///NBPF8///NBPF9///NBPF15<br>///NBPF11///NBPF14 |
| 935 | NCAPG                                                                                      |
| 936 | NCAPG2                                                                                     |
| 937 | NCAPH                                                                                      |
| 938 | NCOA3                                                                                      |
| 939 | NCOR1                                                                                      |
| 940 | NDC1                                                                                       |
| 941 | NDC80                                                                                      |
| 942 | NDFIP1                                                                                     |
| 943 | NDUFA8                                                                                     |
| 944 | NDUFB11                                                                                    |
| 945 | NDUFS5                                                                                     |
| 946 | NEFH                                                                                       |
| 947 | NEIL3                                                                                      |
| 948 | NEK2                                                                                       |
| 949 | NELL2                                                                                      |
| 950 | NET1                                                                                       |
| 951 | NETO2                                                                                      |
| 952 | NFIA                                                                                       |
| 953 | NFIL3                                                                                      |
| 954 | NFKBIZ                                                                                     |
| 955 | NFYC-AS1                                                                                   |
| 956 | NHS                                                                                        |
| 957 | NKG7                                                                                       |
| 958 | NME1                                                                                       |
| 959 | NOG                                                                                        |
| 960 | NOL4L                                                                                      |
| 961 | NOSIP                                                                                      |
| 962 | NOV                                                                                        |
| 963 | NOVA1                                                                                      |
| 964 | NPAS2                                                                                      |
| 965 | NR1D1///THRA                                                                               |
| 966 | NR3C2                                                                                      |
| 967 | NRCAM                                                                                      |
| 968 | NREP                                                                                       |
| 969 | NRG1                                                                                       |
| 970 | NRM                                                                                        |
| 971 | NRP1                                                                                       |
| 972 | NSG1                                                                                       |
| 973 | NSUN6                                                                                      |
| 974 | NSUN7                                                                                      |

|      |                       |
|------|-----------------------|
| 975  | NT5C1B-RDH14///NT5C1B |
| 976  | NT5DC2                |
| 977  | NT5DC4                |
| 978  | NT5E                  |
| 979  | NTPCR                 |
| 980  | NUAK2///AKIP1         |
| 981  | NUCB1                 |
| 982  | NUF2                  |
| 983  | NUMA1                 |
| 984  | NUP107                |
| 985  | NUP188                |
| 986  | NUP210                |
| 987  | NUP35                 |
| 988  | NUP50                 |
| 989  | NUSAP1                |
| 990  | NVL                   |
| 991  | O95081                |
| 992  | OAS1                  |
| 993  | OASL                  |
| 994  | OGN                   |
| 995  | OIP5                  |
| 996  | OLIG1                 |
| 997  | OR2W3                 |
| 998  | ORC1                  |
| 999  | ORC6                  |
| 1000 | OSBP2                 |
| 1001 | OSBPL3                |
| 1002 | OSER1-AS1             |
| 1003 | OSGEP                 |
| 1004 | OTUD7A                |
| 1005 | OXNAD1                |
| 1006 | P2RY1                 |
| 1007 | P4HA2                 |
| 1008 | P4HB                  |
| 1009 | PABPC1                |
| 1010 | PABPC4                |
| 1011 | PACRGL                |
| 1012 | PACSN1                |
| 1013 | PAICS                 |
| 1014 | PAIP1                 |
| 1015 | PALD1                 |
| 1016 | PALM2-AKAP2///AKAP2   |
| 1017 | PAM                   |
| 1018 | PARM1                 |



|      |           |
|------|-----------|
| 1019 | PARPBP    |
| 1020 | PARVB     |
| 1021 | PASK      |
| 1022 | PATJ      |
| 1023 | PBK       |
| 1024 | PCCB      |
| 1025 | PCMTD1    |
| 1026 | PCNA      |
| 1027 | PCSK5     |
| 1028 | PDCD4-AS1 |
| 1029 | PDE3B     |
| 1030 | PDE7A     |
| 1031 | PDE9A     |
| 1032 | PDIA3     |
| 1033 | PDIA4     |
| 1034 | PDIA5     |
| 1035 | PDIA6     |
| 1036 | PDK1      |
| 1037 | PDZK1IP1  |
| 1038 | PEG10     |
| 1039 | PELI2     |
| 1040 | PERP      |
| 1041 | PEX19     |
| 1042 | PFKFB3    |
| 1043 | PFN2      |
| 1044 | PGGHG     |
| 1045 | PHACTR2   |
| 1046 | PHC3      |
| 1047 | PHF19     |
| 1048 | PHGDH     |
| 1049 | PHLDA1    |
| 1050 | PHTF1     |
| 1051 | PI3       |
| 1052 | PIGS      |
| 1053 | PIK3AP1   |
| 1054 | PIK3IP1   |
| 1055 | PIP4K2A   |
| 1056 | PITPNB    |
| 1057 | PKHD1L1   |
| 1058 | PLA2G12A  |
| 1059 | PLAG1     |
| 1060 | PLCG2     |
| 1061 | PLEK      |
| 1062 | PLEKHA1   |
| 1063 | PLEKHB1   |

|      |            |
|------|------------|
| 1064 | PLK1       |
| 1065 | PLK4       |
| 1066 | PLOD1      |
| 1067 | PLOD2      |
| 1068 | PLP2       |
| 1069 | PLPP6      |
| 1070 | PLS3       |
| 1071 | PLSCR1     |
| 1072 | PLXDC1     |
| 1073 | PMAIP1     |
| 1074 | PMCH       |
| 1075 | PMCHL1     |
| 1076 | PMF1       |
| 1077 | PMM2       |
| 1078 | PNISR      |
| 1079 | PNO1       |
| 1080 | POC1A      |
| 1081 | POLA1      |
| 1082 | POLE2      |
| 1083 | POLI       |
| 1084 | POLQ       |
| 1085 | POLR2D     |
| 1086 | POMP       |
| 1087 | PON2       |
| 1088 | POU2AF1    |
| 1089 | PPBP       |
| 1090 | PPIB       |
| 1091 | PPIF       |
| 1092 | PPOX       |
| 1093 | PPP1CA     |
| 1094 | PPP1R3E    |
| 1095 | PPP4R2     |
| 1096 | PRAF2      |
| 1097 | PRC1       |
| 1098 | PRDM1      |
| 1099 | PRDX3      |
| 1100 | PRDX4      |
| 1101 | PRF1       |
| 1102 | PRKAG2-AS1 |
| 1103 | PRKCA      |
| 1104 | PRKCA-AS1  |
| 1105 | PRKCQ-AS1  |
| 1106 | PRKRIP1    |
| 1107 | PRKXP1     |
| 1108 | PRMT2      |

|      |           |
|------|-----------|
| 1109 | PRPF31    |
| 1110 | PRPF39    |
| 1111 | PRR11     |
| 1112 | PRR12     |
| 1113 | PRSS33    |
| 1114 | PSAP      |
| 1115 | PSAT1     |
| 1116 | PSMA1     |
| 1117 | PSMB9     |
| 1118 | PSMG4     |
| 1119 | PSPH      |
| 1120 | PSTPIP2   |
| 1121 | PTCD3     |
| 1122 | PTCH1     |
| 1123 | PTGS2     |
| 1124 | PTMS      |
| 1125 | PTPRF     |
| 1126 | PTPRJ     |
| 1127 | PTPRK     |
| 1128 | PTPRN2    |
| 1129 | PTTG1     |
| 1130 | PTTG3P    |
| 1131 | PURA      |
| 1132 | PWAR5     |
| 1133 | PWAR6     |
| 1134 | PWP1      |
| 1135 | PXYLP1    |
| 1136 | PYHIN1    |
| 1137 | R3HDM4    |
| 1138 | RAB11A    |
| 1139 | RAB11FIP1 |
| 1140 | RAB27A    |
| 1141 | RAB30     |
| 1142 | RAB8B     |
| 1143 | RABAC1    |
| 1144 | RACGAP1   |
| 1145 | RAD51     |
| 1146 | RAD51AP1  |
| 1147 | RALGAPB   |
| 1148 | RALGPS2   |
| 1149 | RANBP1    |
| 1150 | RANBP2    |
| 1151 | RAP1GAP2  |
| 1152 | RAPGEF6   |
| 1153 | RASGEF1A  |

|      |                                                         |
|------|---------------------------------------------------------|
| 1154 | RASGRF2                                                 |
| 1155 | RBBP7                                                   |
| 1156 | RBBP8                                                   |
| 1157 | RBL2                                                    |
| 1158 | RBM22                                                   |
| 1159 | RBM26                                                   |
| 1160 | RBM28                                                   |
| 1161 | RBM42                                                   |
| 1162 | RBM7                                                    |
| 1163 | BPMS                                                    |
| 1164 | RCAN3                                                   |
| 1165 | RECQL4                                                  |
| 1166 | REEP4                                                   |
| 1167 | REEP5                                                   |
| 1168 | REG4                                                    |
| 1169 | RELA                                                    |
| 1170 | REPS2                                                   |
| 1171 | RETSAT                                                  |
| 1172 | RFC3                                                    |
| 1173 | RFC5                                                    |
| 1174 | RFX2                                                    |
| 1175 | RGCC                                                    |
| 1176 | RGMB                                                    |
| 1177 | RGS1                                                    |
| 1178 | RGS16                                                   |
| 1179 | RHOU                                                    |
| 1180 | RIMKLB                                                  |
| 1181 | RMI2                                                    |
| 1182 | RNASE1                                                  |
| 1183 | RNASEH2A                                                |
| 1184 | RNF135                                                  |
| 1185 | RNF144A                                                 |
| 1186 | RNF157-AS1                                              |
| 1187 | ROBO1                                                   |
| 1188 | ROBO3                                                   |
| 1189 | RPGRIP1                                                 |
| 1190 | RPL15                                                   |
| 1191 | RPL17-C18orf32///SNORD58C///SNORD58A///SNORD58B///RPL17 |
| 1192 | RPL22                                                   |
| 1193 | RPL31                                                   |
| 1194 | RPL37A                                                  |
| 1195 | RPS23                                                   |

|      |                   |
|------|-------------------|
| 1196 | RPS4Y1            |
| 1197 | RRBP1             |
| 1198 | RRM1              |
| 1199 | RRM2              |
| 1200 | RRP12             |
| 1201 | RRP36             |
| 1202 | RTN3              |
| 1203 | RTN4              |
| 1204 | RTN4IP1           |
| 1205 | RUNDC3A           |
| 1206 | RUNX2             |
| 1207 | S100A11           |
| 1208 | SAMSN1            |
| 1209 | SAP30             |
| 1210 | SAR1B             |
| 1211 | SATB1             |
| 1212 | SATB1-AS1         |
| 1213 | SCAF11            |
| 1214 | SCARNA13///SNHG10 |
| 1215 | SCD               |
| 1216 | SCD5              |
| 1217 | SCIN              |
| 1218 | SCML1             |
| 1219 | SDC1              |
| 1220 | SDC2              |
| 1221 | SDCCAG8           |
| 1222 | SDF2              |
| 1223 | SDF2L1            |
| 1224 | SEC11C            |
| 1225 | SEC14L1           |
| 1226 | SEC16             |
| 1227 | SEC24A            |
| 1228 | SEC24D            |
| 1229 | SEC31B            |
| 1230 | SEC61A1           |
| 1231 | SEL1L3            |
| 1232 | SELENBP1          |
| 1233 | SEPHS1            |
| 1234 | SESN3             |
| 1235 | SETBP1            |
| 1236 | SF1               |
| 1237 | SFSWAP            |
| 1238 | SFXN2             |
| 1239 | SGK223            |
| 1240 | SGO2              |

|      |                     |
|------|---------------------|
| 1241 | SGSM2               |
| 1242 | SGTA                |
| 1243 | SH3BGRL2            |
| 1244 | SH3YL1              |
| 1245 | SHCBP1              |
| 1246 | SHKBP1              |
| 1247 | SHMT1               |
| 1248 | SHMT2               |
| 1249 | SIAE                |
| 1250 | SIGLEC1             |
| 1251 | SIGLEC12///SIGLEC10 |
| 1252 | SIGLEC17P           |
| 1253 | SIK1                |
| 1254 | SKA1                |
| 1255 | SKA2                |
| 1256 | SKA3                |
| 1257 | SLAMF1              |
| 1258 | SLAMF7              |
| 1259 | SLBP                |
| 1260 | SLC12A2             |
| 1261 | SLC14A1             |
| 1262 | SLC16A1             |
| 1263 | SLC16A10            |
| 1264 | SLC16A14            |
| 1265 | SLC1A4              |
| 1266 | SLC1A5              |
| 1267 | SLC22A23            |
| 1268 | SLC25A25-AS1        |
| 1269 | SLC25A37            |
| 1270 | SLC25A39            |
| 1271 | SLC26A11            |
| 1272 | SLC27A2             |
| 1273 | SLC2A5              |
| 1274 | SLC35F6///CENPA     |
| 1275 | SLC38A10            |
| 1276 | SLC3A2              |
| 1277 | SLC40A1             |
| 1278 | SLC43A3             |
| 1279 | SLC44A1             |
| 1280 | SLC45A4             |
| 1281 | SLC4A1              |
| 1282 | SLC6A8              |
| 1283 | SLC7A5              |
| 1284 | SLC7A6              |
| 1285 | SLC7A8              |

|      |                     |
|------|---------------------|
| 1286 | SLCO4A1             |
| 1287 | SLMAP               |
| 1288 | SLPI                |
| 1289 | SMAD3               |
| 1290 | SMC2                |
| 1291 | SMC4                |
| 1292 | SMCO4               |
| 1293 | SMIM14              |
| 1294 | SMIM24              |
| 1295 | SMIM8               |
| 1296 | SMNP                |
| 1297 | SMS                 |
| 1298 | SNCA                |
| 1299 | SNORD50B///SNORD50A |
| 1300 | SNORD68///RPL13     |
| 1301 | SNRPE               |
| 1302 | SNX10               |
| 1303 | SNX5                |
| 1304 | SNX9                |
| 1305 | SORL1               |
| 1306 | SOX4                |
| 1307 | SP3                 |
| 1308 | SPAG5               |
| 1309 | SPATA13             |
| 1310 | SPATS2              |
| 1311 | SPATS2L             |
| 1312 | SPC24               |
| 1313 | SPC25               |
| 1314 | SPCS3               |
| 1315 | SPEF2               |
| 1316 | SPG20               |
| 1317 | SPIN3               |
| 1318 | SPIN4               |
| 1319 | SPINK2              |
| 1320 | SPINT2              |
| 1321 | SPSB1               |
| 1322 | SPTLC1              |
| 1323 | SPTLC2              |
| 1324 | SPTSSA              |
| 1325 | SRGN                |
| 1326 | SRP19               |
| 1327 | SRP54               |
| 1328 | SRP68               |
| 1329 | SRP72               |

|      |                         |
|------|-------------------------|
| 1330 | SRPR                    |
| 1331 | SRPRB                   |
| 1332 | SSBP2                   |
| 1333 | SSR1                    |
| 1334 | SSR3                    |
| 1335 | SSR4                    |
| 1336 | STIL                    |
| 1337 | STIM1                   |
| 1338 | STK39                   |
| 1339 | STK4                    |
| 1340 | STMN1                   |
| 1341 | STMN2                   |
| 1342 | STMN3                   |
| 1343 | STOM                    |
| 1344 | STRADB                  |
| 1345 | STRBP                   |
| 1346 | STT3A                   |
| 1347 | STT3B                   |
| 1348 | STX11                   |
| 1349 | STX3                    |
| 1350 | STXBP3                  |
| 1351 | SULT1B1                 |
| 1352 | SUPT3H                  |
| 1353 | SUSD1                   |
| 1354 | SUV39H2                 |
| 1355 | SUZ12                   |
| 1356 | SVIL                    |
| 1357 | SVIP                    |
| 1358 | SYMPK                   |
| 1359 | SYNE1                   |
| 1360 | SYNE2                   |
| 1361 | SYNJ2BP-COX16///SYNJ2BP |
| 1362 | SYT11                   |
| 1363 | TACC3                   |
| 1364 | TAL1                    |
| 1365 | TALDO1                  |
| 1366 | TAOK2                   |
| 1367 | TARP///TRGV9///TRGC2    |
| 1368 | TBC1D10A                |
| 1369 | TBK1                    |
| 1370 | TBL2                    |
| 1371 | TBX21                   |
| 1372 | TCEA3                   |
| 1373 | TCEAL2                  |



|      |              |
|------|--------------|
| 1374 | TCEAL3       |
| 1375 | TCEAL4       |
| 1376 | TCF19        |
| 1377 | TCF7         |
| 1378 | TCP11L2      |
| 1379 | TESC         |
| 1380 | TFDP1        |
| 1381 | TGFBI        |
| 1382 | TGFBR3       |
| 1383 | TGIF1        |
| 1384 | TGM2         |
| 1385 | TGOLN2       |
| 1386 | THBD         |
| 1387 | THEM4        |
| 1388 | THNSL1       |
| 1389 | TIGD1        |
| 1390 | TIGD3        |
| 1391 | TIGIT        |
| 1392 | TIMELESS     |
| 1393 | TIPIN        |
| 1394 | TJP2         |
| 1395 | TK1          |
| 1396 | TMEM106C     |
| 1397 | TMEM133      |
| 1398 | TMEM161B-AS1 |
| 1399 | TMEM165      |
| 1400 | TMEM2        |
| 1401 | TMEM30B      |
| 1402 | TMEM33       |
| 1403 | TMEM50B      |
| 1404 | TMEM97       |
| 1405 | TMOD1        |
| 1406 | TMOD2        |
| 1407 | TMPO         |
| 1408 | TMPRSS3      |
| 1409 | TMTC3        |
| 1410 | TMX2         |
| 1411 | TMX4         |
| 1412 | TNFRSF10C    |
| 1413 | TNFRSF17     |
| 1414 | TNFRSF1B     |
| 1415 | TNFSF8       |
| 1416 | TNIP3        |
| 1417 | TNRC6B       |
| 1418 | TNRC6C       |

|      |               |
|------|---------------|
| 1419 | TNRC6C-AS1    |
| 1420 | TNS1          |
| 1421 | TOB1          |
| 1422 | TOP2A         |
| 1423 | TOR1B         |
| 1424 | TOR4A         |
| 1425 | TOX           |
| 1426 | TP53INP1      |
| 1427 | TP73-AS1      |
| 1428 | TPM2          |
| 1429 | TPM4          |
| 1430 | TPX2          |
| 1431 | TRA2B         |
| 1432 | TRABD2A       |
| 1433 | TRAF3IP3      |
| 1434 | TRAM2         |
| 1435 | TRAPPC13      |
| 1436 | TREM1         |
| 1437 | TRIB1         |
| 1438 | TRIM28        |
| 1439 | TRIM59        |
| 1440 | TRIP13        |
| 1441 | TRMT1L        |
| 1442 | TROAP         |
| 1443 | TRPC1         |
| 1444 | TRPM6         |
| 1445 | TSC22D3       |
| 1446 | TSHR          |
| 1447 | TSPAN2        |
| 1448 | TSPAN5        |
| 1449 | TSPYL1        |
| 1450 | TTC28         |
| 1451 | TTC39B        |
| 1452 | TTC3P1///TTC3 |
| 1453 | TTC9          |
| 1454 | TTK           |
| 1455 | TTN           |
| 1456 | TTN-AS1       |
| 1457 | TUBA1B        |
| 1458 | TUBA1C        |
| 1459 | TUBB          |
| 1460 | TUBB2A        |
| 1461 | TUBB3         |
| 1462 | TUBB4B        |
| 1463 | TUBE1         |

|      |                  |
|------|------------------|
| 1464 | TUBG1            |
| 1465 | TXK              |
| 1466 | TXLNGY           |
| 1467 | TXN              |
| 1468 | TXNDC11          |
| 1469 | TXNDC17          |
| 1470 | TXNDC5///BLOC1S5 |
| 1471 | TXNIP            |
| 1472 | TYMS             |
| 1473 | TYSND1           |
| 1474 | UAP1             |
| 1475 | UBA5             |
| 1476 | UBE2C            |
| 1477 | UBE2F            |
| 1478 | UBE2J1           |
| 1479 | UBE2S            |
| 1480 | UBE2T            |
| 1481 | UBN2             |
| 1482 | UBTF             |
| 1483 | UBXN7            |
| 1484 | UCHL1            |
| 1485 | UCK2             |
| 1486 | UHRF1            |
| 1487 | USO1             |
| 1488 | USP18            |
| 1489 | USP28            |
| 1490 | USP34            |
| 1491 | USP51            |
| 1492 | USP53            |
| 1493 | UTS2             |
| 1494 | VIMP             |
| 1495 | VMA21            |
| 1496 | VMP1             |
| 1497 | VSIG1            |
| 1498 | VWA5A            |
| 1499 | WAC              |
| 1500 | WARS             |
| 1501 | WBP11            |
| 1502 | WBP7             |
| 1503 | WDFY2            |
| 1504 | WDHD1            |
| 1505 | WDR34            |
| 1506 | WDR37            |
| 1507 | WDR76            |
| 1508 | WEE1             |

|      |                   |
|------|-------------------|
| 1509 | WFS1              |
| 1510 | WHAMMP2           |
| 1511 | WHAMMP2///WHAMMP3 |
| 1512 | WHSC1             |
| 1513 | WLS               |
| 1514 | XIST              |
| 1515 | XRCC1             |
| 1516 | YBX3              |
| 1517 | YIF1B             |
| 1518 | YLPM1             |
| 1519 | YPEL2             |
| 1520 | YWHAE             |
| 1521 | YWHAH             |
| 1522 | ZBED1             |
| 1523 | ZBP1              |
| 1524 | ZBTB10            |
| 1525 | ZBTB18            |
| 1526 | ZBTB20            |
| 1527 | ZC3H6             |
| 1528 | ZC3H8             |
| 1529 | ZC3HAV1           |
| 1530 | ZC3HAV1L          |
| 1531 | ZCCHC10           |
| 1532 | ZCCHC8            |
| 1533 | ZDHHC2            |
| 1534 | ZEB1              |
| 1535 | ZEB2              |
| 1536 | ZFAND6            |
| 1537 | ZFP28             |
| 1538 | ZFP91             |
| 1539 | ZMAT1             |
| 1540 | ZMYM3             |
| 1541 | ZNF217            |
| 1542 | ZNF24             |
| 1543 | ZNF260            |
| 1544 | ZNF264            |
| 1545 | ZNF302            |
| 1546 | ZNF329            |
| 1547 | ZNF337            |
| 1548 | ZNF347            |
| 1549 | ZNF367            |
| 1550 | ZNF397            |
| 1551 | ZNF439            |
| 1552 | ZNF440            |

|      |            |
|------|------------|
| 1553 | ZNF483     |
| 1554 | ZNF493     |
| 1555 | ZNF506     |
| 1556 | ZNF548     |
| 1557 | ZNF550     |
| 1558 | ZNF558     |
| 1559 | ZNF559     |
| 1560 | ZNF573     |
| 1561 | ZNF577     |
| 1562 | ZNF585A    |
| 1563 | ZNF595     |
| 1564 | ZNF609     |
| 1565 | ZNF629     |
| 1566 | ZNF641     |
| 1567 | ZNF667-AS1 |
| 1568 | ZNF677     |
| 1569 | ZNF683     |
| 1570 | ZNF711     |
| 1571 | ZNF717     |
| 1572 | ZNF776     |
| 1573 | ZNF780B    |
| 1574 | ZNF829     |
| 1575 | ZNF84      |
| 1576 | ZNF844     |
| 1577 | ZNF862     |
| 1578 | ZNF91      |
| 1579 | ZNRD1ASP   |
| 1580 | ZSCAN18    |
| 1581 | ZWILCH     |
| 1582 | ZWINT      |
| 1583 | ZXDB       |
| 1584 | ZZZ3       |

**Table S2 Drug candidates identified using CMap tool**

| Sr. No. | Name              | Description                                             |
|---------|-------------------|---------------------------------------------------------|
| 1       | JAK3-inhibitor-VI | JAK inhibitor                                           |
| 2       | PPIE              | RNA binding motif (RRM) containing                      |
| 3       | CD-437            | Retinoid receptor agonist                               |
| 4       | ID4               | Basic helix-loop-helix proteins                         |
| 5       | crizotinib        | ALK inhibitor                                           |
| 6       | CBS               | Hydrogen sulphide synthesis                             |
| 7       | triclosan         | Enoyl-[acyl-carrier-protein] reductase [NADH] inhibitor |

|    |                   |                                            |
|----|-------------------|--------------------------------------------|
| 8  | PAN2              | Ubiquitin-specific peptidases              |
| 9  | ARHGEF7           | Rho guanine nucleotide exchange factors    |
| 10 | HIST2H2BE         | Histones / Replication-dependent           |
| 11 | A-443644          | AKT inhibitor                              |
| 12 | canertinib        | EGFR inhibitor                             |
| 13 | masitinib         | KIT inhibitor                              |
| 14 | JNJ-7706621       | CDK inhibitor                              |
| 15 | IKK-2-inhibitor-V | IKK inhibitor                              |
| 16 | obatoclax         | BCL inhibitor                              |
| 17 | staurosporine     | PKC inhibitor                              |
| 18 | SCH-79797         | Proteasome inhibitor                       |
| 19 | niclosamide       | DNA replication inhibitor                  |
| 20 | ryuvidine         | Histone lysine methyltransferase inhibitor |
| 21 | sorafenib         | FLT3 inhibitor                             |
| 22 | daunorubicin      | RNA synthesis inhibitor                    |
| 23 | wortmannin        | PI3K inhibitor                             |
| 24 | triptolide        | RNA polymerase inhibitor                   |
| 25 | arctigenin        | MEK inhibitor                              |
| 26 | elvitegravir      | HIV integrase inhibitor                    |
| 27 | UK-356618         | Metalloproteinase inhibitor                |
| 28 | lopinavir         | HIV protease inhibitor                     |
| 29 | VX-222            | HCV inhibitor                              |
| 30 | emetine           | Protein synthesis inhibitor                |
| 31 | cephaeline        | Protein synthesis inhibitor                |
| 32 | narciclasine      | Cofilin signaling pathway activator        |
| 33 | homoharringtonine | Protein synthesis inhibitor                |
| 34 | BCL2-inhibitor    | BCL inhibitor                              |
| 35 | chlorpromazine    | Dopamine receptor antagonist               |
| 36 | panobinostat      | HDAC inhibitor                             |
| 37 | temsirolimus      | MTOR inhibitor                             |
| 38 | doxorubicin       | Topoisomerase inhibitor                    |
| 39 | roscovitine       | CDK inhibitor                              |
| 40 | rucaparib         | PARP inhibitor                             |
| 41 | verrucarin-a      | Protein synthesis inhibitor                |
| 42 | lestaurtinib      | FLT3 inhibitor                             |
| 43 | teniposide        | Topoisomerase inhibitor                    |
| 44 | ellipticine       | Topoisomerase inhibitor                    |
| 45 | SN-38             | Topoisomerase inhibitor                    |
| 46 | bemesetron        | Serotonin receptor antagonist              |
| 47 | VX-702            | p38 MAPK inhibitor                         |
| 48 | deoxycholic-acid  | G protein-coupled receptor agonist         |
| 49 | anisomycin        | DNA synthesis inhibitor                    |
| 50 | L-689560          | Glutamate receptor antagonist              |
| 51 | chlordiazepoxide  | Benzodiazepine receptor agonist            |
| 52 | SPDEF             | ETS Transcription Factors                  |

|    |                   |                                               |
|----|-------------------|-----------------------------------------------|
| 53 | VX-745            | p38 MAPK inhibitor                            |
| 54 | NTNCB             | Neuropeptide receptor antagonist              |
| 55 | carbenoxolone     | 11-beta-HSD1 inhibitor                        |
| 56 | oligomycin-a      | ATP synthase inhibitor                        |
| 57 | esculin           | Antioxidant                                   |
| 58 | aminoglutethimide | Glucocorticoid receptor antagonist            |
| 59 | ethisterone       | Progestogen hormone                           |
| 60 | TW-37             | BCL inhibitor                                 |
| 61 | PD-102807         | Acetylcholine receptor antagonist             |
| 62 | strophanthidin    | ATPase inhibitor                              |
| 63 | AG-879            | Angiogenesis inhibitor                        |
| 64 | SR-59230A         | Adrenergic receptor antagonist                |
| 65 | ZM-447439         | Aurora kinase inhibitor                       |
| 66 | indirubin         | CDK inhibitor                                 |
| 67 | HDAC2             | Histone deacetylases                          |
| 68 | SA-792728         | Sphingosine kinase inhibitor                  |
| 69 | butoconazole      | Bacterial cell wall synthesis inhibitor       |
| 70 | phenylbutazone    | Cyclooxygenase inhibitor                      |
| 71 | tyrphostin-A9     | Protein tyrosine kinase inhibitor             |
| 72 | CGP-71683         | Neuropeptide receptor antagonist              |
| 73 | rimexolone        | Glucocorticoid receptor agonist               |
| 74 | AR-A014418        | Glycogen synthase kinase inhibitor            |
| 75 | lamotrigine       | Serotonin receptor antagonist                 |
| 76 | sappanone-a       | Tyrosinase inhibitor                          |
| 77 | APOC2             | Apolipoproteins                               |
| 78 | PRL-3-inhibitor-I | Tyrosine phosphatase inhibitor                |
| 79 | ZSTK-474          | PI3K inhibitor                                |
| 80 | zibotentan        | Endothelin receptor antagonist                |
| 81 | GARS              | Aminoacyl tRNA synthetases / Class II         |
| 82 | RO-16-6941        | Monoamine oxidase inhibitor                   |
| 83 | KARS              | Aminoacyl tRNA synthetases / Class II         |
| 84 | ADAM10            | ADAM metalloproteinase domain containing      |
| 85 | lumicolchicine    | Colchicine isomer, non-binder of microtubules |
| 86 | VU-0418946-1      | HIF modulator                                 |
| 87 | CREB3L4           | basic leucine zipper proteins                 |
| 88 | SKF-89976A        | GABA uptake inhibitor                         |
| 89 | AHCY              | Adenosine turnover                            |
| 90 | MK-2206           | AKT inhibitor                                 |
| 91 | tyrphostin-AG-126 | ERK1 and ERK2 phosphorylation inhibitor       |
| 92 | PLD1              | Phosphatidylcholine-specific phospholipase D  |
| 93 | methylene-blue    | Guanylyl cyclase inhibitor                    |
| 94 | GRWD1             | WD repeat domain containing                   |
| 95 | HMGCS1            | Lanosterol biosynthesis pathway               |
| 96 | SB-203580         | p38 MAPK inhibitor                            |
| 97 | GGPS1             | Lanosterol biosynthesis pathway               |

|     |                      |                                          |
|-----|----------------------|------------------------------------------|
| 98  | 5-nonyloxytryptamine | Serotonin receptor agonist               |
| 99  | USP47                | Ubiquitin-specific peptidases            |
| 100 | procainamide         | Sodium channel blocker                   |
| 101 | NNC-55-0396          | T-type calcium channel blocker           |
| 102 | SKP2                 | F-boxes / Leucine-rich repeats           |
| 103 | ZNF114               | Zinc fingers, C2H2-type                  |
| 104 | DYNLL2               | Cytoplasmic dyneins                      |
| 105 | DL-PDMP              | Glucosyltransferase inhibitor            |
| 106 | HLI-373              | MDM inhibitor                            |
| 107 | WDR61                | WD repeat domain containing              |
| 108 | EIF4G1               | Parkinson disease                        |
| 109 | PQ-401               | IGF-1 inhibitor                          |
| 110 | clomipramine         | Serotonin transporter inhibitor (SERT)   |
| 111 | CHEMBL-374350        | NFkB pathway inhibitor                   |
| 112 | TSPAN8               | Tetraspanins                             |
| 113 | terfenadine          | Histamine receptor antagonist            |
| 114 | IL20                 | Interleukins and interleukin receptors   |
| 115 | KU-55933             | ATM kinase inhibitor                     |
| 116 | PHA-793887           | CDK inhibitor                            |
| 117 | perhexiline          | Carnitine palmitoyltransferase inhibitor |
| 118 | zosuquidar           | P-glycoprotein inhibitor                 |
| 119 | pifithrin            | Interleukin receptor antagonist          |
| 120 | danusertib           | Aurora kinase inhibitor                  |
| 121 | VU-0400193-3         | Glutamate receptor modulator             |
| 122 | tyrphostin-AG-1478   | EGFR inhibitor                           |
| 123 | nefazodone           | Adrenergic inhibitor                     |
| 124 | JNK-9L               | JNK inhibitor                            |
| 125 | ICI-199441           | Opioid receptor agonist                  |
| 126 | ispinesib            | Kinesin-like spindle protein inhibitor   |
| 127 | PTB1                 | AMPK activator                           |
| 128 | CGP-60474            | CDK inhibitor                            |
| 129 | bicuculline          | GABA receptor antagonist                 |
| 130 | INPP1                | Inositol polyphosphate phosphatases      |
| 131 | WZ-4002              | EGFR inhibitor                           |
| 132 | remoxipride          | Dopamine receptor antagonist             |
| 133 | fasudil              | Rho associated kinase inhibitor          |
| 134 | HRH1                 | Histamine receptors                      |
| 135 | SID-26681509         | Cathepsin inhibitor                      |
| 136 | OSI-027              | MTOR inhibitor                           |
| 137 | AG-494               | EGFR inhibitor                           |
| 138 | HDAC3                | Histone deacetylases                     |
| 139 | benazepril           | ACE inhibitor                            |
| 140 | tyrphostin-AG-112    | Protein tyrosine kinase inhibitor        |
| 141 | ENMD-2076            | FLT3 inhibitor                           |



|     |                        |                                        |
|-----|------------------------|----------------------------------------|
| 142 | SIRT2                  | Histone deacetylases                   |
| 143 | protriptyline          | Tricyclic antidepressant               |
| 144 | brucine                | Glycine receptor antagonist            |
| 145 | butein                 | EGFR inhibitor                         |
| 146 | palbociclib            | CDK inhibitor                          |
| 147 | SIRT6                  | Histone deacetylases (HDACs)           |
| 148 | PTPN1                  | Protein tyrosine phosphatases          |
| 149 | BAY-59-3074            | Cannabinoid receptor partial agonist   |
| 150 | SA-792709              | Retinoid receptor agonist              |
| 151 | trioxsalen             | DNA synthesis inhibitor                |
| 152 | vanoxerine             | Dopamine uptake inhibitor              |
| 153 | STO-609                | Calmodulin antagonist                  |
| 154 | WH-4023                | SRC inhibitor                          |
| 155 | angiogenesis-inhibitor | Angiogenesis inhibitor                 |
| 156 | KAT6B                  | Histone acetyltransferases (HATs)      |
| 157 | dorsomorphin           | AMPK inhibitor                         |
| 158 | HG-5-113-01            | Protein kinase inhibitor               |
| 159 | IKK-16                 | IKK inhibitor                          |
| 160 | NSC-3852               | HDAC inhibitor                         |
| 161 | ZG-10                  | JNK inhibitor                          |
| 162 | CGP-53353              | EGFR inhibitor                         |
| 163 | menadione              | Mitochondrial DNA polymerase inhibitor |
| 164 | valdecixib             | Cyclooxygenase inhibitor               |
| 165 | BAX-channel-blocker    | Cytochrome C release inhibitor         |
| 166 | XL-147                 | PI3K inhibitor                         |
| 167 | lypressin              | Vasopressin receptor agonist           |
| 168 | papaverine             | Phosphodiesterase inhibitor            |
| 169 | aminopurvalanol-a      | Tyrosine kinase inhibitor              |
| 170 | nonoxynol-9            | Membrane integrity inhibitor           |
| 171 | penfluridol            | T-type calcium channel blocker         |
| 172 | BMP4                   | Bone morphogenetic proteins            |
| 173 | barasertib             | Aurora kinase inhibitor                |
| 174 | CALM3                  | EF-hand domain containing              |
| 175 | malonoben              | Protein tyrosine kinase inhibitor      |
| 176 | WZ-4-145               | EGFR inhibitor                         |
| 177 | amperozide             | Dopamine receptor antagonist           |
| 178 | alisertib              | Aurora kinase inhibitor                |
| 179 | diphenyleneiodonium    | Nitric oxide synthase inhibitor        |
| 180 | tamibarotene           | Retinoid receptor agonist              |
| 181 | NVP-TAE684             | ALK inhibitor                          |
| 182 | CGK-733                | ATR kinase inhibitor                   |
| 183 | quinoxaline            | Algicide                               |
| 184 | apicidin               | HDAC inhibitor                         |

|     |              |                              |
|-----|--------------|------------------------------|
| 185 | PIK-75       | DNA protein kinase inhibitor |
| 186 | NPI-2358     | Tubulin inhibitor            |
| 187 | BX-795       | IKK inhibitor                |
| 188 | GW-501516    | PPAR receptor agonist        |
| 189 | alvocidib    | CDK inhibitor                |
| 190 | AURKB        | Aurora kinase                |
| 191 | mammea-a     | other antibiotic             |
| 192 | thiostrepton | FOXM1 inhibitor              |
| 193 | chloroxine   | Opioid receptor antagonist   |
| 194 | BIBX-1382    | EGFR inhibitor               |
| 195 | AG-14361     | PARP inhibitor               |
| 196 | rottlerin    | MAP kinase inhibitor         |
| 197 | alvespimycin | HSP inhibitor                |
| 198 | piceatannol  | SYK inhibitor                |
| 199 | flutamide    | Androgen receptor antagonist |
| 200 | BMS-536924   | IGF-1 inhibitor              |
